# Supplementary material for: Preferential Packing of Acidic Glycosidases and Proteases into Bacteroides Outer Membrane Vesicles
Source: PubMed Central journal article supplement — mBio. 2014 Mar 11;5(2):e00909-14. doi: 10.1128/mBio.00909-14 (PMC3952158; doi:10.1128/mbio.00909-14), 2014-03-11
Supplement: mbo002141770st1.pdf [file mbo002141770st1.pdf]

| <b>Number</b> | <b>Function</b>                            | <b>Transmembrane domain or Lipo signal</b> | <b>pI</b> |
|---------------|--------------------------------------------|--------------------------------------------|-----------|
| BF3804        | Fimbrillin-A Associated Anchor Lipoprotein | Yes                                        | Acidic    |
| BF1578        | Fimbrillin-A Associated Anchor Protein     | No                                         | Acidic    |
| BF4084        | Fimbrillin-A Associated Anchor Protein     | No                                         | Acidic    |
| BF4165        | Phospholipase                              | Yes                                        | Alkaline  |
| BF2707        | Heme-Binding Lipoprotein HmuY              | Yes                                        | Acidic    |
| BF3139        | Putative Exonuclease/Phosphatase           | No                                         | Acidic    |
| BF3433        | Hypothetical Protein                       | Yes                                        | Acidic    |
| BF3434        | Hypothetical Protein                       | Yes                                        | Acidic    |
| BF2257        | Hypothetical Protein                       | No                                         | Acidic    |
| BF1581        | Hypothetical Protein                       | Yes                                        | Acidic    |
| BF1215        | Hypothetical Protein                       | Yes                                        | Acidic    |
| BF2163        | Hypothetical Protein                       | Yes                                        | Acidic    |
| BF3067        | Hypothetical Protein                       | Yes                                        | Acidic    |
| BF1363        | Hypothetical Protein                       | Yes                                        | Acidic    |
| BF1629        | Hypothetical Protein                       | Yes                                        | Acidic    |
| BF3428        | Hypothetical Protein                       | Yes                                        | Acidic    |
| BF3256        | Hypothetical Protein                       | No                                         | Acidic    |
| BF3942        | Hypothetical Protein                       | No                                         | Acidic    |
| BF2301        | Hypothetical Protein                       | Yes                                        | Acidic    |
| BF0540        | Hypothetical Protein                       | Yes                                        | Acidic    |
| BF1881        | Hypothetical Protein                       | Yes                                        | Acidic    |
| BF4343        | Hypothetical Protein                       | Yes                                        | Acidic    |
| BF3669        | Hypothetical Protein                       | Yes                                        | Acidic    |
| BF1641        | Hypothetical Protein                       | No                                         | Acidic    |
| BF2571        | Hypothetical Protein                       | Yes                                        | Acidic    |
| BF3250        | Hypothetical Protein                       | Yes                                        | Acidic    |
| BF1383        | Hypothetical Protein                       | Yes                                        | Alkaline  |
| BF2100        | Hypothetical Protein                       | Yes                                        | Alkaline  |
| BF2968        | Hypothetical Protein                       | Yes                                        | Alkaline  |
| BF1214        | Hypothetical Protein                       | Yes                                        | Alkaline  |
| BF4352        | Hypothetical Protein                       | Yes                                        | Alkaline  |
