# Supplementary material for: Preferential Packing of Acidic Glycosidases and Proteases into Bacteroides Outer Membrane Vesicles
Source: PubMed Central journal article supplement — mBio. 2014 Mar 11;5(2):e00909-14. doi: 10.1128/mBio.00909-14 (PMC3952158; doi:10.1128/mbio.00909-14), 2014-03-11
Supplement: mbo002141770st2.pdf [file mbo002141770st2.pdf]

| <b>Number</b> | <b>Function</b>                                       | <b>Transmembrane domain or Lipo signal</b> | <b>pI</b> | <b>Found in OMV</b> |
|---------------|-------------------------------------------------------|--------------------------------------------|-----------|---------------------|
| BF1618        | RagA-Like TonB-linked Outer Membrane Protein          | Yes                                        | Alkaline  | No                  |
| BF0341        | RagA-Like TonB-linked Outer Membrane Protein          | Yes                                        | Alkaline  | No                  |
| BF2195        | RagA-Like TonB-linked Outer Membrane Protein          | Yes                                        | Alkaline  | No                  |
| BF3444        | RagA-Like TonB-linked Outer Membrane Protein          | No                                         | Alkaline  | No                  |
| BF3146        | RagA-Like TonB-linked Outer Membrane Protein          | Yes                                        | Acidic    | No                  |
| BF0018        | TonB-Dependent Outer Membrane Receptor                | Yes                                        | Alkaline  | No                  |
| BF4344        | TonB-Dependent Outer Membrane Receptor                | Yes                                        | Alkaline  | No                  |
| BF1029        | TonB-Dependent Outer Membrane Receptor                | No                                         | Alkaline  | No                  |
| BF2541        | TonB-Dependent Outer Membrane Receptor                | No                                         | Alkaline  | No                  |
| BF2697        | TonB-Dependent Outer Membrane Receptor                | No                                         | Acidic    | No                  |
| BF1583        | TonB-Dependent Outer Membrane Receptor                | No                                         | Alkaline  | No                  |
| BF0551        | TonB-Dependent Outer Membrane Receptor                | No                                         | Alkaline  | No                  |
| BF3178        | TonB-Dependent Outer Membrane Receptor                | Yes                                        | Alkaline  | No                  |
| BF3068        | TonB-Dependent Outer Membrane Receptor                | Yes                                        | Alkaline  | No                  |
| BF0154        | Outer Membrane Efflux Lipoprotein                     | Yes                                        | Alkaline  | No                  |
| BF1959        | OmpA-Family peptidoglycan-associated lipoprotein      | Yes                                        | Alkaline  | No                  |
| BF0586        | Lipid-Associated Lipoprotein                          | Yes                                        | Alkaline  | No                  |
| BF0156        | Biotin-Lipoyl Outer Membrane Efflux Transport Protein | Yes                                        | Alkaline  | No                  |
| BF2529        | HlyD family secretion lipoprotein                     | Yes                                        | Alkaline  | No                  |
| BF2476        | Biotin-Lipoyl Outer Membrane Efflux Transport Protein | No                                         | Alkaline  | No                  |
| BF3077        | OmpH-Like Outer Membrane Lipoprotein                  | Yes                                        | Alkaline  | No                  |
| BF0899        | Dipeptidyl Peptidase                                  | Yes                                        | Alkaline  | No                  |
| BF1378        | Disulfide Reductase PdiA                              | Yes                                        | Neutral   | No                  |
| BF3366        | Outer Membrane Efflux Protein                         | Yes                                        | Alkaline  | No                  |
| pBF9343.38c   | Plasmid Transfer Protein                              | No                                         | Alkaline  | No                  |
| BF3759        | Outer Membrane Efflux Protein                         | No                                         | Alkaline  | No                  |
| pBF9343.35c   | Outer Membrane Peptidoglycan-Associated Lipoprotein   | Yes                                        | Neutral   | No                  |
| BF2694        | Thioredoxin                                           | Yes                                        | Alkaline  | No                  |
| BF1285        | Hypothetical Protein                                  | Yes                                        | Alkaline  | No                  |
| BF1390        | Hypothetical Protein                                  | Yes                                        | Alkaline  | No                  |
| BF1622        | Hypothetical Protein                                  | Yes                                        | Alkaline  | No                  |
| BF2622        | Hypothetical Protein                                  | Yes                                        | Alkaline  | No                  |

|             |                                                  |     |          |     |
|-------------|--------------------------------------------------|-----|----------|-----|
| BF3319      | Hypothetical Protein                             | Yes | Alkaline | No  |
| BF3810      | OmpA                                             | No  | Alkaline | Yes |
| BF1028      | Putative Heme-Binding Transport Lipoprotein HmuY | Yes | Acidic   | Yes |
| BF2761      | Heat Shock-Related Serine Protease               | Yes | Acidic   | Yes |
| BF2494      | Putative plasmid transporting protein            | No  | Acidic   | Yes |
| BF3042      | NigD-like lipoprotein                            | Yes | Acidic   | Yes |
| BF2776      | Lipocalin-like lipoprotein                       | Yes | Alkaline | Yes |
| BF3567      | Sugar Hydrolase (Xylanase)                       | Yes | Acidic   | Yes |
| BF3888      | Peptidyl-Prolyl Cis-Trans Isomerase              | Yes | Acidic   | Yes |
| BF2475      | Outer Membrane Efflux Protein                    | Yes | Alkaline | Yes |
| BF2706      | Lipocalin-Like Protein                           | Yes | Acidic   | Yes |
| BF1979      | Serine peptidase                                 | Yes | Acidic   | Yes |
| BF1285      | OmpA-like lipoprotein                            | No  | Alkaline | Yes |
| BF2739      | Thioderoxin                                      | Yes | Acidic   | Yes |
| BF4040      | Outer Membrane Phosphate-Selective Porin         | No  | Alkaline | Yes |
| BF0448      | OmpH-Like Cationic Protein                       | Yes | Acidic   | Yes |
| BF3152      | Outer Membrane Efflux Protein                    | No  | Acidic   | Yes |
| BF1670      | Sporulation related lipoprotein                  | Yes | Alkaline | Yes |
| BF2639      | DNA-Uptake Lipoprotein ComL                      | No  | Alkaline | Yes |
| BF2528      | Outer Membrane Efflux Protein                    | No  | Acidic   | Yes |
| BF4216      | TonB-Dependent Outer Membrane Receptor Protein   | Yes | Acidic   | Yes |
| BF0811      | Peptide-N-glycosidase                            | Yes | Acidic   | Yes |
| BF3236      | Sugar Hydrolase (Mannosidase)                    | Yes | Acidic   | Yes |
| BF2884      | Ferritin A                                       | No  | Acidic   | Yes |
| BF4308      | Peptidyl-Prolyl Cis-Trans Isomerase              | No  | Acidic   | Yes |
| BF3964      | Outer Membrane Efflux                            | No  | Acidic   | Yes |
| BF4309      | Peptidyl-Prolyl Cis-Trans Isomerase              | Yes | Alkaline | Yes |
| BF3342      | Beta-Lactamase                                   | Yes | Acidic   | Yes |
| BF2064      | Aminopeptidase                                   | Yes | Neutral  | Yes |
| BF3528      | ExbD Biopolymer Transport Protein                | Yes | Acidic   | Yes |
| BF0657      | Aminopeptidase                                   | Yes | Neutral  | Yes |
| BF1184      | Putative META-domain containing lipoprotein      | Yes | Alkaline | Yes |
| BF1621      | OmpA-Like Outer Membrane Protein                 | Yes | Alkaline | Yes |
| BF1987      | Collagen-like protein                            | Yes | Acidic   | Yes |
| BF1957      | SusD-like protein                                | Yes | Acidic   | Yes |
| BF0595      | SusD-like protein                                | Yes | Acidic   | Yes |
| BF0340      | SusD-like protein                                | Yes | Acidic   | Yes |
| BF2196      | SusD-like protein                                | Yes | Acidic   | Yes |
| BF0589      | SusD-like protein                                | Yes | Acidic   | Yes |
| BF3145      | SusD-like protein                                | Yes | Acidic   | Yes |
| BF1619      | SusD-like protein                                | Yes | Acidic   | Yes |
| BF1802      | SusD-like protein                                | Yes | Acidic   | Yes |
| BF1687      | Hypothetical protein                             | Yes | Acidic   | Yes |
| BF0991      | Hypothetical protein                             | No  | Acidic   | Yes |
| BF4280      | Hypothetical protein                             | Yes | Alkaline | Yes |
| BF4035      | Hypothetical protein                             | Yes | Alkaline | Yes |
| BF2158      | Hypothetical protein                             | Yes | Alkaline | Yes |
| BF1004      | Hypothetical protein                             | No  | Acidic   | Yes |
| pBF9343.20c | Hypothetical protein                             | No  | Acidic   | Yes |
| BF0922      | Hypothetical protein                             | Yes | Acidic   | Yes |

|        |                      |     |          |     |
|--------|----------------------|-----|----------|-----|
| BF0521 | Hypothetical protein | Yes | Alkaline | Yes |
| BF2161 | Hypothetical protein | Yes | Acidic   | Yes |
| BF2566 | Hypothetical protein | Yes | Acidic   | Yes |
| BF0883 | Hypothetical protein | Yes | Acidic   | Yes |
| BF4230 | Hypothetical protein | Yes | Acidic   | Yes |
| BF2334 | Hypothetical protein | No  | Alkaline | Yes |
| BF1345 | Hypothetical protein | Yes | Alkaline | Yes |
| BF3563 | Hypothetical protein | No  | Alkaline | Yes |
| BF2026 | Hypothetical protein | No  | Acidic   | Yes |
| BF0522 | Hypothetical protein | Yes | Acidic   | Yes |
| BF0876 | Hypothetical protein | Yes | Acidic   | Yes |
| BF3547 | Hypothetical protein | No  | Alkaline | Yes |
| BF2105 | Hypothetical protein | Yes | Acidic   | Yes |
| BF1542 | Hypothetical protein | No  | Alkaline | Yes |
| BF3144 | Hypothetical protein | Yes | Acidic   | Yes |
| BF0451 | Hypothetical protein | Yes | Acidic   | Yes |
| BF0941 | Hypothetical protein | Yes | Acidic   | Yes |
| BF1151 | Hypothetical protein | Yes | Alkaline | Yes |
| BF1885 | Hypothetical protein | No  | Alkaline | Yes |
| BF3423 | Hypothetical protein | Yes | Acidic   | Yes |
