# Supplementary material for: Preferential Packing of Acidic Glycosidases and Proteases into Bacteroides Outer Membrane Vesicles
Source: PubMed Central journal article supplement — mBio. 2014 Mar 11;5(2):e00909-14. doi: 10.1128/mBio.00909-14 (PMC3952158; doi:10.1128/mbio.00909-14), 2014-03-11
Supplement: mbo002141770st3.pdf [file mbo002141770st3.pdf]

| <b>Number</b> | <b>Function</b>                         | <b>Transmembrane domain or Liposignal</b> | <b>pI</b> |
|---------------|-----------------------------------------|-------------------------------------------|-----------|
| BT_0656       | OspA                                    | Yes                                       | Acidic    |
| BT_1956       | Cell surface protein                    | No                                        | Acidic    |
| BT_3313       | Carbohydrate binding protein            | No                                        | Acidic    |
| BT_3740       | Putative cell adhesion protein          | No                                        | Acidic    |
| BT_3148       | Putative polysaccharide binding protein | No                                        | Acidic    |
| BT_3147       | Fimbrillin-A associated anchor proteins | No                                        | Acidic    |
| BT_1896       | cell surface antigen                    | No                                        | Acidic    |
| BT_1954       | Protein-binding surface layer protein   | Yes                                       | Acidic    |
| BT_0316       | hemin receptor                          | Yes                                       | Acidic    |
| BT_2095       | surface layer protein                   | Yes                                       | Acidic    |
| BT_2317       | Fimbrial protein                        | Yes                                       | Acidic    |
| BT_3949       | peptidyl-prolyl cis-trans isomerase     | Yes                                       | Acidic    |
| BT_3911       | malate dehydrogenase                    | Yes                                       | Acidic    |
| BT_1512       | surface protein                         | Yes                                       | Acidic    |
| BT_1538       | Hemagglutinin                           | Yes                                       | Alkaline  |
| BT_4005       | NigD-like protein                       | Yes                                       | Acidic    |
| BT_0177       | NigD-like protein                       | Yes                                       | Acidic    |
| BT_4719       | NigD-like protein                       | Yes                                       | Acidic    |
| BT_1040       | TonB-dependent outer membrane receptor  | No                                        | Acidic    |
| BT_3983       | TonB-dependent outer membrane receptor  | No                                        | Alkaline  |
| BT_3240       | TonB-dependent outer membrane receptor  | No                                        | Acidic    |
| BT_3569       | TonB-dependent outer membrane receptor  | No                                        | Acidic    |
| BT_1552       | TonB-dependent outer membrane receptor  | No                                        | Alkaline  |
| BT_2364       | TonB-dependent outer membrane receptor  | No                                        | Alkaline  |
| BT_4246       | SusD-like protein                       | Yes                                       | Acidic    |
| BT_3520       | SusD-like protein                       | Yes                                       | Acidic    |
| BT_3238       | SusD-like protein                       | Yes                                       | Acidic    |
| BT_3568       | SusD-like protein                       | Yes                                       | Acidic    |
| BT_3241       | SusD-like protein                       | Yes                                       | Acidic    |
| BT_1039       | SusD-like protein                       | Yes                                       | Acidic    |
| BT_2365       | SusD-like protein                       | Yes                                       | Acidic    |
| BT_1439       | SusD-like protein                       | Yes                                       | Acidic    |
| BT_2263       | SusD-like protein                       | Yes                                       | Acidic    |
| BT_2259       | SusD-like protein                       | Yes                                       | Acidic    |
| BT_1553       | SusD-like protein                       | Yes                                       | Acidic    |
| BT_4306       | Hypothetical protein                    | Yes                                       | Acidic    |
| BT_3413       | Hypothetical protein                    | Yes                                       | Acidic    |
| BT_3236       | Hypothetical protein                    | Yes                                       | Acidic    |
| BT_1036       | Hypothetical protein                    | Yes                                       | Acidic    |
| BT_1574       | Hypothetical protein                    | Yes                                       | Acidic    |
| BT_4368       | Hypothetical protein                    | No                                        | Acidic    |
| BT_4367       | Hypothetical protein                    | Yes                                       | Alkaline  |
| BT_1486       | Hypothetical protein                    | Yes                                       | Acidic    |
| BT_1487       | Hypothetical protein                    | Yes                                       | Acidic    |
| BT_1579       | Hypothetical protein                    | Yes                                       | Alkaline  |
| BT_1488       | Hypothetical protein                    | Yes                                       | Acidic    |
| BT_0323       | Hypothetical protein                    | No                                        | Alkaline  |
| BT_2438       | Hypothetical protein                    | Yes                                       | Acidic    |
| BT_1395       | Hypothetical protein                    | Yes                                       | Acidic    |
| BT_0766       | Hypothetical protein                    | Yes                                       | Alkaline  |
| BT_0174       | Hypothetical protein                    | No                                        | Acidic    |

|         |                      |     |          |
|---------|----------------------|-----|----------|
| BT_2437 | Hypothetical protein | No  | Acidic   |
| BT_0225 | Hypothetical protein | Yes | Alkaline |
| BT_0410 | Hypothetical protein | Yes | Alkaline |
| BT_1895 | Hypothetical protein | Yes | Alkaline |
| BT_2753 | Hypothetical protein | Yes | Alkaline |
| BT_1287 | Hypothetical protein | Yes | Acidic   |
| BT_3222 | Hypothetical protein | Yes | Acidic   |
| BT_2170 | Hypothetical protein | Yes | Alkaline |
