# Supplementary material for: Preferential Packing of Acidic Glycosidases and Proteases into Bacteroides Outer Membrane Vesicles
Source: PubMed Central journal article supplement — mBio. 2014 Mar 11;5(2):e00909-14. doi: 10.1128/mBio.00909-14 (PMC3952158; doi:10.1128/mbio.00909-14), 2014-03-11
Supplement: mbo002141770st4.pdf [file mbo002141770st4.pdf]

| <b>Number</b> | <b>Function</b>                        | <b>Transmembrane domain or Lipo signal</b> | <b>pI</b> | <b>Found in OMV</b> |
|---------------|----------------------------------------|--------------------------------------------|-----------|---------------------|
| BT_3239       | TonB-dependent outer membrane receptor | No                                         | Alkaline  | No                  |
| BT_1799       | TonB-dependent outer membrane receptor | Yes                                        | Alkaline  | No                  |
| BT_2409       | TonB-dependent outer membrane receptor | No                                         | Alkaline  | No                  |
| BT_2260       | TonB-dependent outer membrane receptor | No                                         | Alkaline  | Yes                 |
| BT_2758       | Phosphate-selective porin              | No                                         | Alkaline  | No                  |
| BT_1440       | TonB-dependent outer membrane receptor | Yes                                        | Alkaline  | Yes                 |
| BT_2817       | TonB-dependent outer membrane receptor | Yes                                        | Acidic    | No                  |
| BT_2268       | TonB-dependent outer membrane receptor | Yes                                        | Acidic    | Yes                 |
| BT_2264       | TonB-dependent outer membrane receptor | No                                         | Acidic    | Yes                 |
| BT_3958       | TonB-dependent outer membrane receptor | Yes                                        | Acidic    | Yes                 |
| BT_1763       | TonB-dependent outer membrane receptor | Yes                                        | Acidic    | Yes                 |
| BT_0658       | conjugal transfer protein              | Yes                                        | Alkaline  | No                  |
| BT_3560       | Porin                                  | Yes                                        | Alkaline  | Yes                 |
| BT_0418       | OmpA                                   | No                                         | Alkaline  | Yes                 |
| BT_1194       | OmpA                                   | Yes                                        | Alkaline  | Yes                 |
| BT_1391       | OmpA                                   | No                                         | Alkaline  | Yes                 |
| BT_1613       | OmpH                                   | Yes                                        | Acidic    | Yes                 |
| BT_1185       | OmpA                                   | Yes                                        | Acidic    | Yes                 |
| BT_3852       | OmpA                                   | No                                         | Acidic    | Yes                 |
| BT_3562       | Lys-gingipain                          | Yes                                        | Acidic    | Yes                 |
| BT_3742       | Xylanase                               | Yes                                        | Acidic    | Yes                 |
| BT_3959       | SusD-like protein                      | Yes                                        | Acidic    | Yes                 |
| BT_1762       | SusD-like protein                      | No                                         | Acidic    | Yes                 |
| BT_2269       | SusD-like protein                      | Yes                                        | Acidic    | Yes                 |
| BT_3901a      | Hypothetical protein                   | Yes                                        | Alkaline  | Yes                 |
| BT_1414       | Hypothetical protein                   | Yes                                        | Alkaline  | No                  |
| BT_0227       | Hypothetical protein                   | Yes                                        | Alkaline  | No                  |
| BT_2844       | Hypothetical protein                   | No                                         | Alkaline  | Yes                 |
| BT_1328       | Hypothetical protein                   | Yes                                        | Alkaline  | Yes                 |
| BT_0645       | Hypothetical protein                   | Yes                                        | Alkaline  | Yes                 |
| BT_4614       | Hypothetical protein                   | Yes                                        | Alkaline  | Yes                 |
| BT_0646       | Hypothetical protein                   | Yes                                        | Alkaline  | Yes                 |
| BT_1502       | Hypothetical protein                   | Yes                                        | Acidic    | No                  |
| BT_1798       | Hypothetical protein                   | No                                         | Acidic    | Yes                 |
| BT_3561       | Hypothetical protein                   | Yes                                        | Acidic    | Yes                 |
| BT_1491       | Hypothetical protein                   | Yes                                        | Acidic    | Yes                 |
| BT_2262       | Hypothetical protein                   | No                                         | Acidic    | Yes                 |
